# Supplementary material
Source: Royal Society of Chemistry journal article supplement (doi:10.1039/d6nj00742b)

## Supporting Information

### Engineering flame-retardancy in water-based adhesives: A structure–performance driven approach for enhanced safety and functionality.

Pranay Tambe<sup>a</sup>, Ankita A. Kadam<sup>a</sup>, Kaustubh M. Kadam<sup>a</sup>, Kartiki L. Bhosale<sup>a</sup>, Navin D. Satardekar<sup>a</sup>, Akash Damshet<sup>a</sup>, Surajit Some<sup>a\*</sup> Corresponding Author

<sup>a</sup>Department of Speciality Chemicals Technology, Institute of Chemical Technology, Mumbai-400019, India.

E-mail: [sr.some@ictmumbai.edu.in](mailto:sr.some@ictmumbai.edu.in)

Present Address

<sup>a</sup>Department of Speciality Chemicals Technology, Institute of Chemical Technology, Mumbai-400019, India.

| Sr. No   | Content                                                    |
|----------|------------------------------------------------------------|
| S1       | Additional Experimental Details.                           |
| Table S1 | FTIR Peak Assignments.                                     |
| Table S2 | XRD Data Table.                                            |
| Table S3 | Thermogravimetric Data Table.                              |
| Table S4 | Effect of PAH@TS-2 coating add-on on LOI of cotton fabric. |
| Table S5 | LOI data table.                                            |
| Fig. S1  | Weight bearing test.                                       |
| Fig. S2  | Underwater load bearing test.                              |

#### S1. Additional experimental details

Polyvinyl alcohol (PVA), tannic acid (TA), sodium hexametaphosphate (SHMP), and aluminium hydroxide (Al(OH)<sub>3</sub>) were employed without additional purification. Adhesive mixtures were formulated following the procedure detailed in the main manuscript. The adhesive layer was applied uniformly to wooden substrates (100 mm × 25 mm × 3 mm) using a film applicator, and the bonded assemblies were cured at 60 °C for 24 h.

Water contact angle measurements were conducted using a goniometer (Apex ACAMNSC08, India) via the sessile drop method with 2 μL droplets under ambient laboratory conditions. Tensile shear adhesion testing was performed with a universal testing machine (Tinius Olsen H25KT, India) in accordance with ASTM D906-20 at 28 ± 2 °C and 65–70% relative humidity.

Wet adhesion performance was assessed by immersing bonded samples in distilled water at 28 ± 2 °C for 2 h, followed by mechanical testing immediately after removal to simulate adhesion under humid or moisture-exposed service conditions.

Table S1. Key FTIR peak assignments of components and PAH@TS adhesive.

| Sample | Wavenumber (cm <sup>-1</sup> ) | Assignment               |
|--------|--------------------------------|--------------------------|
| TA     | 3251                           | O–H stretching           |
| TA     | 1709                           | C=O (ester/carboxyl)     |
| SHMP   | 3390                           | O–H (hydrated phosphate) |
| SHMP   | 1090                           | P–O–P                    |
| PVA    | 3281                           | O–H stretching           |
| PVA    | 1095                           | C–O–C                    |
| PAH@TS | 3302                           | Hydrogen-bonded O–H      |
| PAH@TS | 1094                           | P–O / P–O–P              |

Table S2. XRD peak positions of PAH@TS adhesive.

| 2θ (°) | Assignment                        |
|--------|-----------------------------------|
| 19.9   | PVA semi-crystalline (101)        |
| 22.6   | Cellulosic substrate contribution |
| 31.9   | TS structural ordering            |
| 34.1   | Phosphate-related domain          |
| 37.9   | ATH transition                    |
| 46.1   | Amorphous crosslinked phase       |

Table S3. TGA weight loss profile.

| Sample | Temperature range (°C) | Weight loss (%) | Interpretation                           |
|--------|------------------------|-----------------|------------------------------------------|
| PVA    | 65–133                 | 8               | Moisture loss                            |
| PVA    | 260–428                | 83              | Polymer backbone degradation             |
| PVA    | 428–516                | ~100            | Complete decomposition                   |
| PAH    | 70–165                 | 0.5             | Bound water                              |
| PAH    | 338–575                | 68.9            | Polymer degradation                      |
| P@TS   | 71–306                 | 10              | Dehydration + initial phosphate activity |
| P@TS   | 316–800                | 68              | Carbonization                            |

|        |         |      |                                 |
|--------|---------|------|---------------------------------|
| PAH@TS | 61–330  | 7    | Moisture + early char formation |
| PAH@TS | 461–800 | 56.9 | Stable char residue             |

Table S4. Effect of PAH@TS-2 coating add-on on LOI of cotton fabric.

| Loading | LOI (%)       |
|---------|---------------|
| 15 %    | 31.2 ± 0.264  |
| 20 %    | 36.8 ± 0.659  |
| 25 %    | 47.31 ± 0.831 |
| 30 %    | 48.2 ± 0.515  |

Table S5. LOI values of adhesive materials.

| Material (25 % loading on cotton fabric) | LOI (%) |
|------------------------------------------|---------|
| PVA                                      | 18.5. ± |
| PAH                                      | 20.6. ± |
| P@TS                                     | 36.7 ±  |
| PAH@TS-1                                 | 38.7 ±  |
| PAH@TS-2                                 | 47.3 ±  |
| PAH@TS-3                                 | 48.5 ±  |

**Fig. S1.** Weight-bearing evaluation of the PAH@TS adhesive. A wood–wood bonded specimen supporting a static **20 kg load** for 10 min without failure, demonstrating robust adhesion performance compared to other formulations.

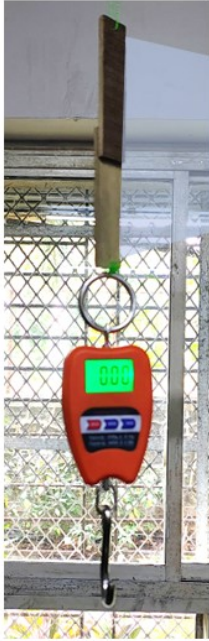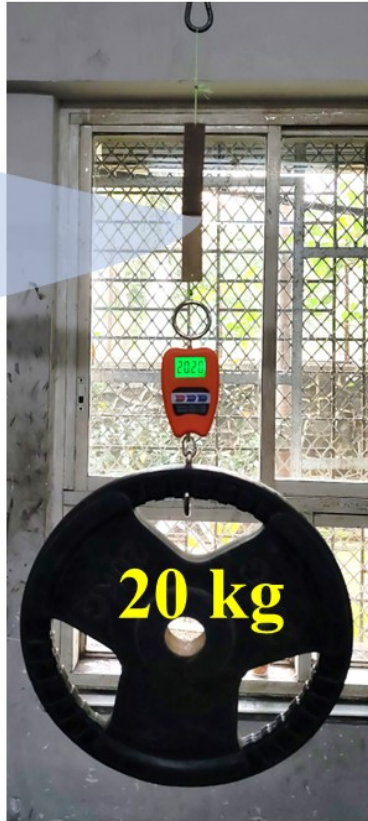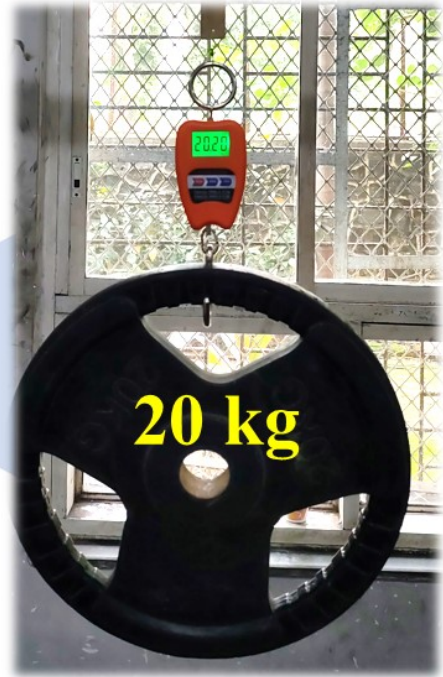

**Fig. S2.** Underwater load-bearing test of the PAH@TS adhesive. A bonded wooden substrate was fully submerged in distilled water, and a 200 g metallic load was suspended from the joint to evaluate wet adhesion stability. The joint remained intact for an extended duration, indicating robust underwater bonding performance.

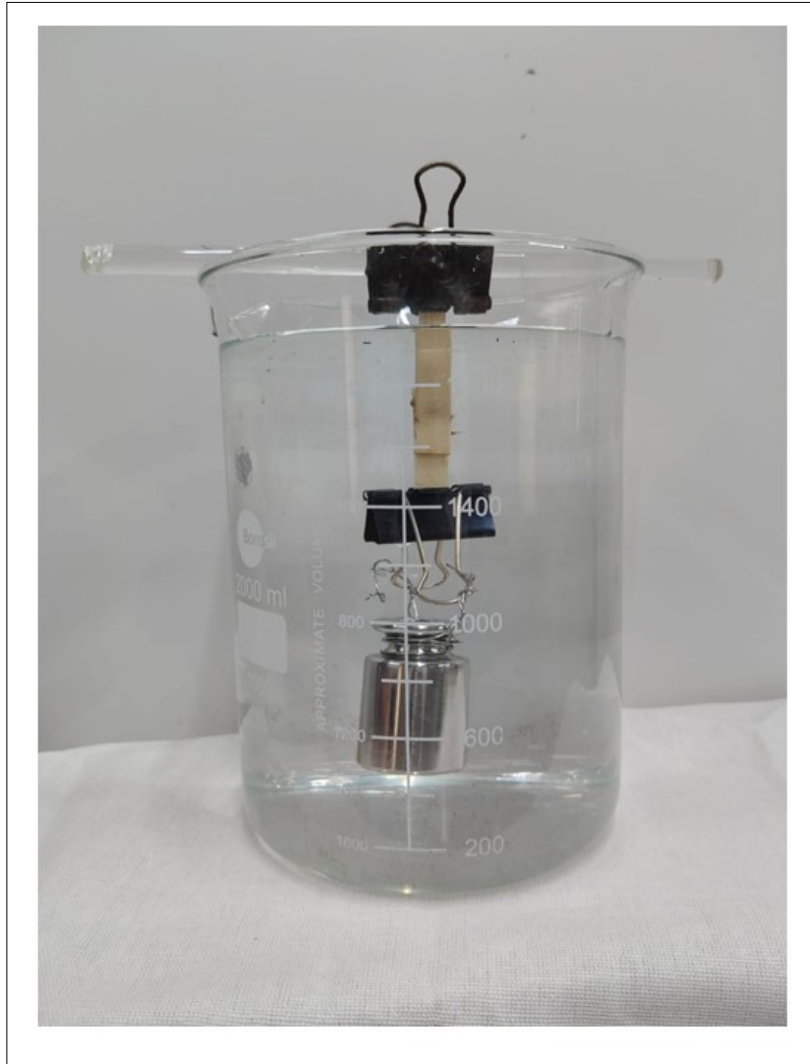

Supplement: d6nj00742b1.pdf [file d6nj00742b1.pdf]
